# Supplementary material
Source: Springer Nature journal article supplement (https://www.springermedizin.de/resource/supplementary/12913_2012_2269_MOESM1_ESM.pdf/9530276)
Supplement: MOESM1 [file 9530276]

Illness/  
injury

Seeking  
diagnosis/  
treatment

- Direct medical expenses
- transport and other indirect costs,
- income loss

- Hire or substitution of labor
- Use of savings
- Borrowing
- Sale of assets
- Other strategies

?

Indebtedness  
and  
impoverishment
